# Supplementary material
Source: PubMed Central journal article supplement (PMC1885515)
Supplement: blood_blood-2006-09-048868_1.pdf [file blood_blood-2006-09-048868_1.pdf]

| Group           | Hb<br>(g/dL) | Mouse<br>body<br>weight (g) | Liver               |                                              |                                | Spleen              |                                              |                                |
|-----------------|--------------|-----------------------------|---------------------|----------------------------------------------|--------------------------------|---------------------|----------------------------------------------|--------------------------------|
|                 |              |                             | Organ<br>weight (g) | Iron conc.<br>( $\mu\text{g}/\text{mg}$ dry) | Tot. iron<br>( $\mu\text{g}$ ) | Organ<br>weight (g) | Iron conc.<br>( $\mu\text{g}/\text{mg}$ dry) | Tot. iron<br>( $\mu\text{g}$ ) |
| 1               | 3.4          | 14.73                       | 1.09                | 2.04                                         | 610.3                          | 1.00                | 2.49                                         | 638.6                          |
|                 | 4.5          | 23.04                       | 1.20                | 2.32                                         | 816.0                          | 0.09                | 1.06                                         | 249.4                          |
|                 | 4.8          | 23.87                       | 1.31                | 1.2                                          | 445.4                          | 1.10                | 0.98                                         | 294.3                          |
|                 | 4.5          | 24.94                       | 0.88                | 0.98                                         | 264.0                          | 0.90                | 1.16                                         | 290.4                          |
|                 | <b>Aver.</b> | <b>4.3</b>                  | <b>21.64</b>        | <b>1.12</b>                                  | <b>1.63</b>                    | <b>533.9</b>        | <b>0.98</b>                                  | <b>1.42</b>                    |
| <b>St. Dev.</b> | <b>0.6</b>   | <b>4.67</b>                 | <b>0.18</b>         | <b>0.65</b>                                  | <b>235.3</b>                   | <b>0.10</b>         | <b>0.72</b>                                  | <b>181.4</b>                   |
| 2               | 3.0          | 16.20                       | 0.84                | 4.58                                         | 1178.3                         | 0.93                | 2.71                                         | 712.6                          |
|                 | 2.2          | 12.91                       | 0.88                | 5.02                                         | 1373.7                         | 0.90                | 2.53                                         | 656.9                          |
|                 | 1.1          | 10.74                       | 0.57                | 8.21                                         | 1414.7                         | 0.67                | 3.83                                         | 680.4                          |
|                 | 2.3          | 13.03                       | 1.06                | 5.30                                         | 1852.8                         | 0.77                | 2.79                                         | 617.1                          |
|                 | 2.3          | 13.90                       | 0.95                | 2.57                                         | 673.3                          | 0.84                | 2.76                                         | 621.3                          |
|                 | <b>Aver.</b> | <b>2.2</b>                  | <b>13.36</b>        | <b>0.86</b>                                  | <b>5.14</b>                    | <b>1298.7</b>       | <b>0.82</b>                                  | <b>2.92</b>                    |
| <b>St. Dev.</b> | <b>0.7</b>   | <b>1.97</b>                 | <b>0.18</b>         | <b>2.02</b>                                  | <b>427.4</b>                   | <b>0.10</b>         | <b>0.52</b>                                  | <b>40.3</b>                    |

**Table S1**
