# Supplementary material
Source: PubMed Central journal article supplement (PMC1885515)

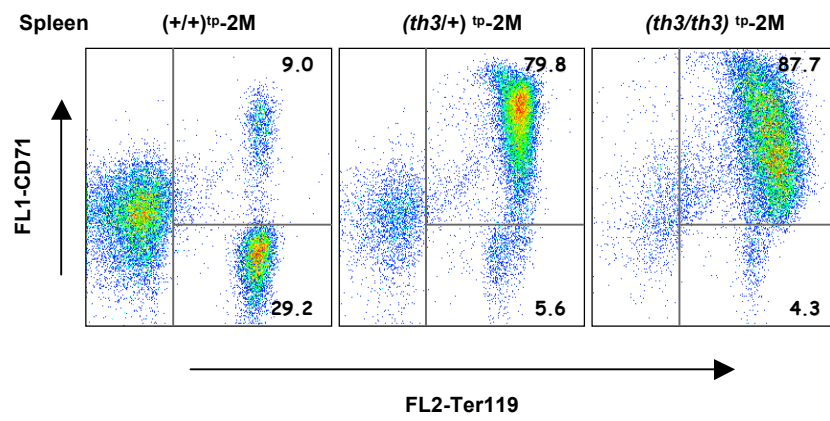

Figure S1

Supplement: blood_blood-2006-09-048868_2.pdf [file blood_blood-2006-09-048868_2.pdf]

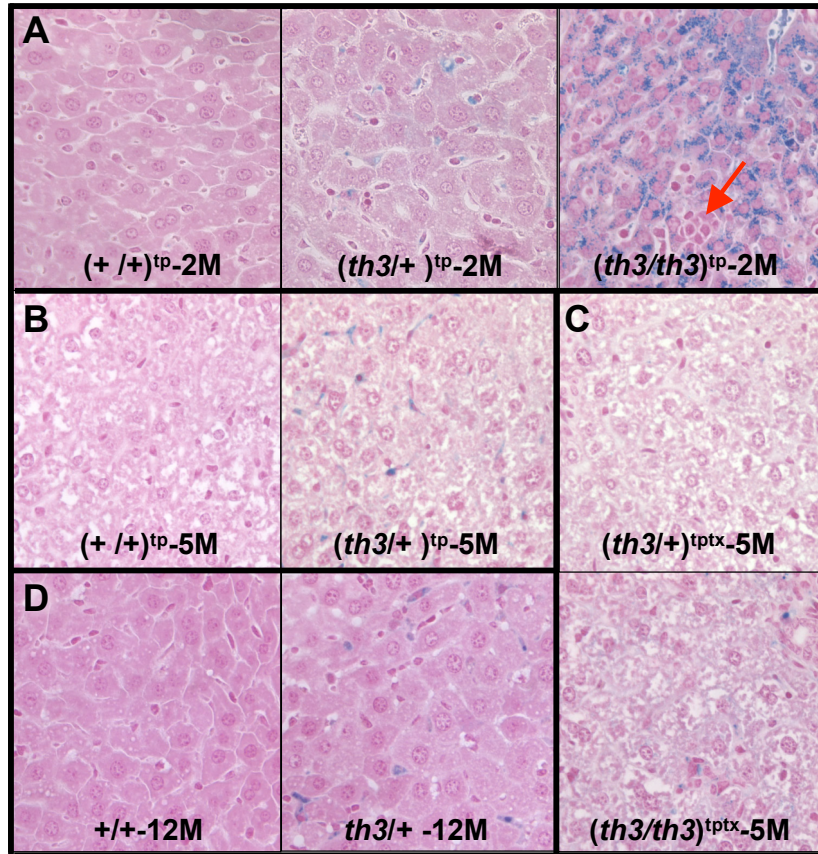

Figure S2

Supplement: blood_blood-2006-09-048868_3.pdf [file blood_blood-2006-09-048868_3.pdf]

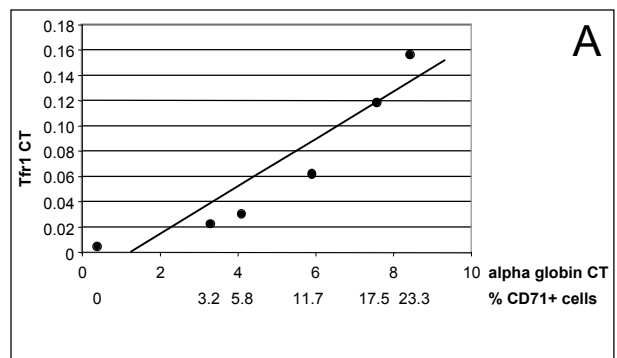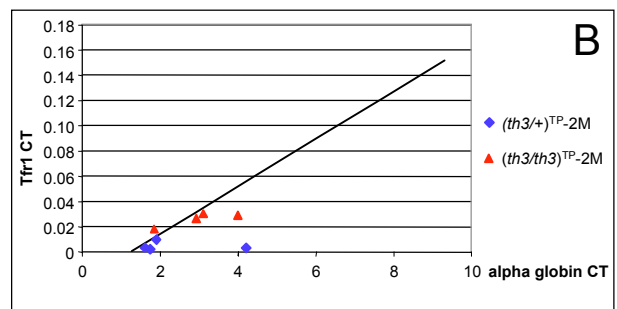

**Figure S3**

Supplement: blood_blood-2006-09-048868_4.pdf [file blood_blood-2006-09-048868_4.pdf]
